# Supplementary material for: The performance and mechanism of a MIL-53(Fe)/ZnIn2S4 heterophase photo-Fenton system in degrading p-nitrophenol
Source: Royal Society of Chemistry journal article supplement (doi:10.1039/d4nj04813j), 2025-01-01
Supplement: d4nj04813j1.pdf [file d4nj04813j1.pdf]

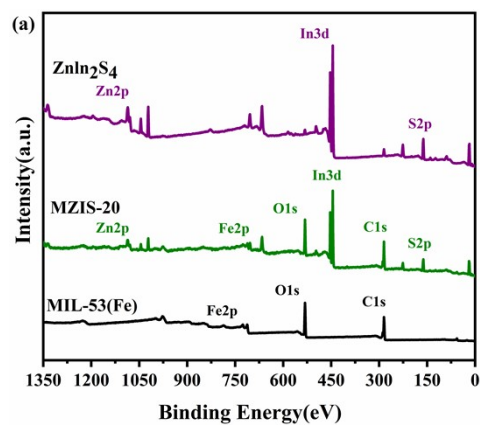

Figure S1. Full XPS spectra of MIL-53, ZnIn<sub>2</sub>S<sub>4</sub>, and MZIS-20

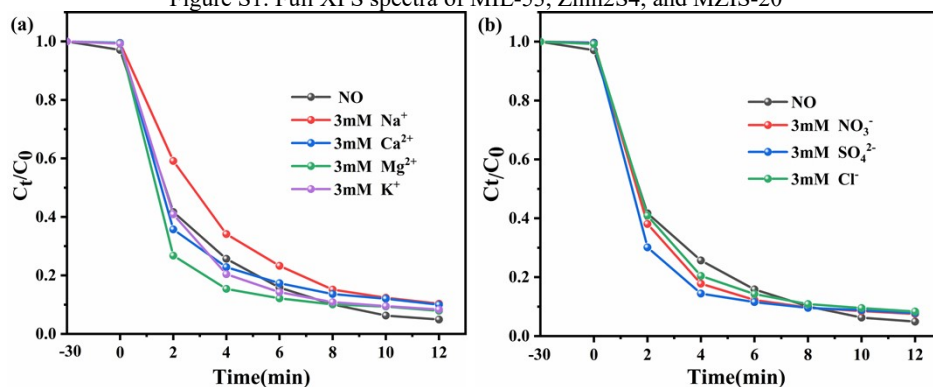

Figure S2. Plots of the effects of (a) different cations (b) anions on the degradation efficiency against PNP
